# Supplementary material
Source: Springer Nature journal article supplement (https://www.springermedizin.de/resource/supplementary/12878_2012_62_MOESM2_ESM.pdf/9441628)

**Multiple myeloma****Follicular Lymphoma****Hodgkin's disease****MAG 95 trial  
Auto-SCT arm**

N= 227

85 patients  
free of  
relapse

N= 142

4 patients  
who  
received  
Allo-SCT

N= 138

30 patients  
dead within  
the first 6  
months

N= 108

**MAG 2002 trial  
Auto-SCT arm**

N= 205 (age &lt; 66)

122 patients  
free of  
relapse

N= 83

4 patients  
who  
received  
Allo-SCT

N=79

45 patients  
dead within  
the first 6  
months

N=34

**N=142****Cohort of FL patients who  
received Auto-SCT**

N=168

25 patients  
free of  
relapse

N= 143

28 patients  
who  
received  
Allo-SCT

N= 115

**Cohort of HD patients**

N= 84

10 patients  
who did not  
receive SCT

N= 74

27 patients  
free of  
relapse

N= 47

22 patients  
who  
received  
Allo-SCT  
6 patients  
who died  
within the 1<sup>st</sup>  
year

N= 25

N= 19

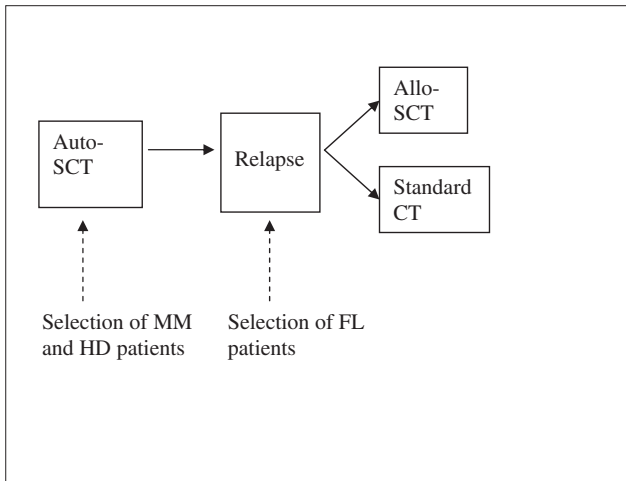

Supplement: MOESM2 [file 9441628]
